# Supplementary material
Source: PubMed Central journal article supplement (PMC3341994)
Supplement: NIHMS359280-supplement-2.pdf [file NIHMS359280-supplement-2.pdf]

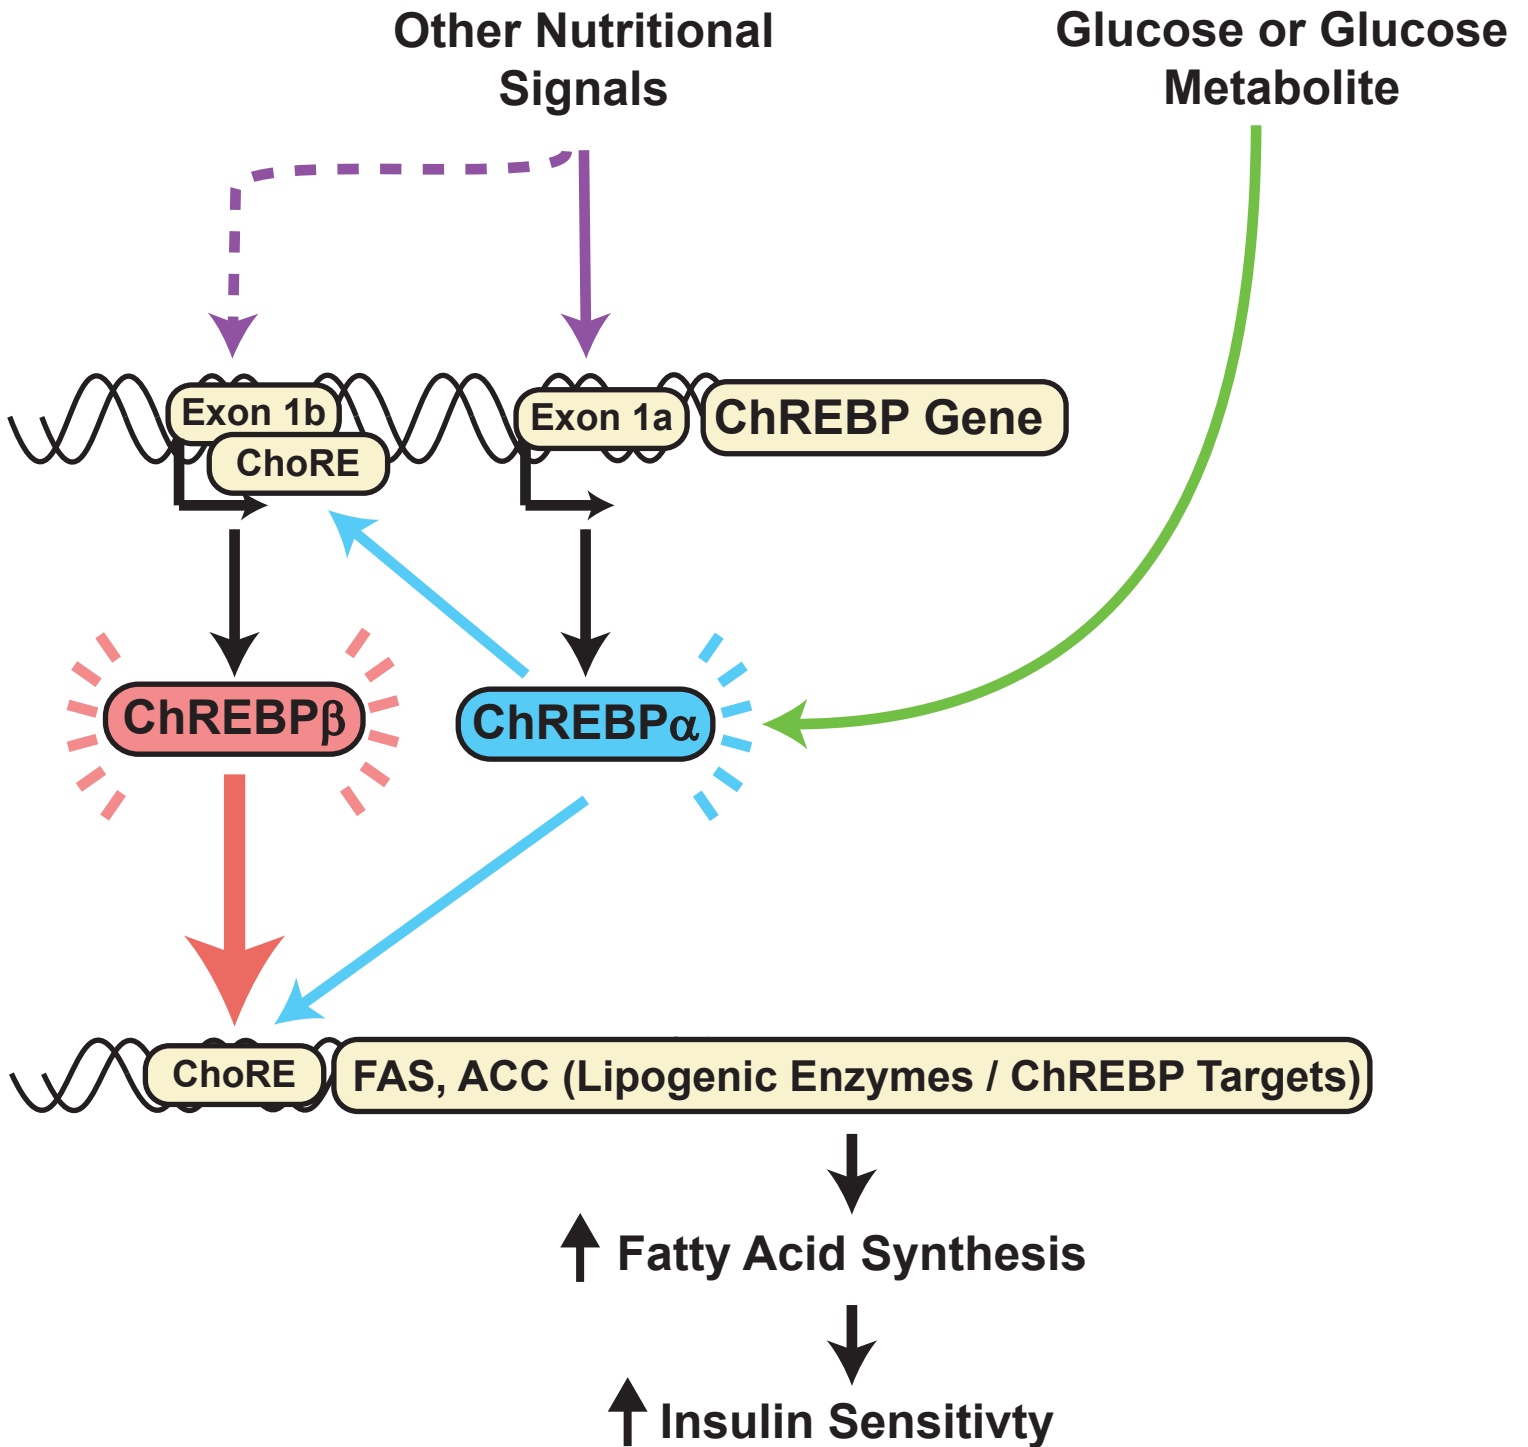

*Supplementary Figure 1.* Glucose-mediated activation of ChREBP $\alpha$  induces expression of ChREBP $\beta$ . Glucose or a glucose metabolite stimulates the transcriptional activity of ChREBP $\alpha$  which binds to ChoREs in its lipogenic targets and in ChREBP $\beta$  resulting in increased gene expression. The increased ChREBP $\beta$  protein further activates expression of ChREBP lipogenic target genes by binding to ChoREs. Whereas glucose regulates ChREBP $\alpha$  transcriptional activity, other nutritional signals regulate ChREBP $\beta$  expression. The activation of ChREBP $\alpha$  and induction of ChREBP $\beta$  expression increase fatty acid synthesis in adipose tissue which improves systemic insulin sensitivity.

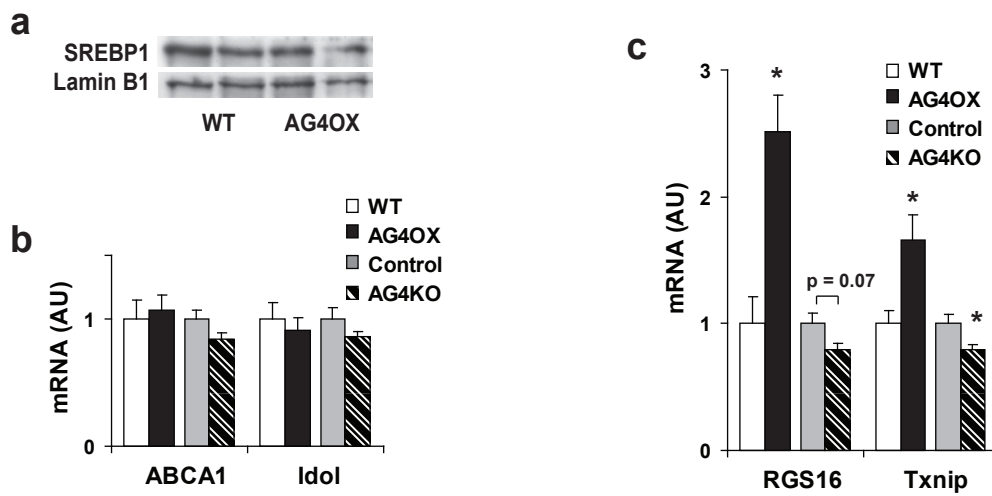

**Supplementary Figure 2.** Changes in ChREBP and lipogenic enzyme expression in AG4OX and AG4KO adipose tissue is not due to changes in SREBP1c nuclear abundance or LXR activity. **a**, Nuclear abundance of mature Srebp1 and Lamin B1 (loading control) protein in WT and AG4OX perigonadal adipose tissue from fed 6-week-old females. Each lane comprises nuclear lysates pooled from 3-4 mice. mRNA of, **b**, LXR transcriptional targets (ABCA1 and Idol) and, **c**, ChREBP transcriptional targets (RGS16 and Txnip) in perigonadal fat from 6-week-old female AG4OX, AG4KO, and littermate control mice (n=10-14 per group). \*P<0.05 compared to the respective controls.

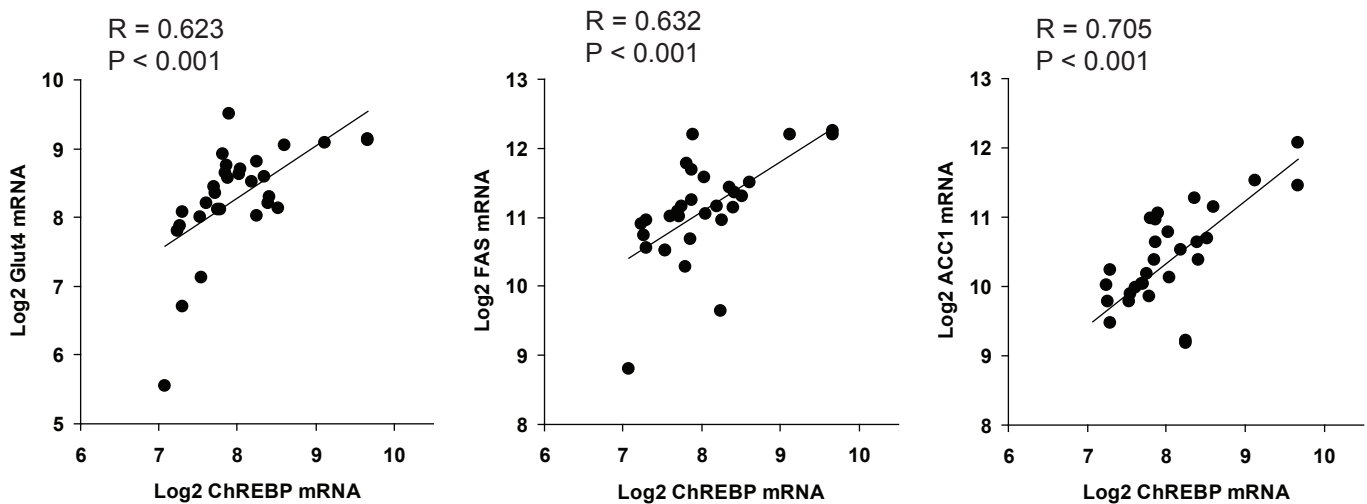

**Supplementary Figure 3.** Adipose tissue Glut4, FAS, and ACC1 mRNA expression correlate with ChREBP mRNA expression across 30 mouse strains. Each point on the graphs represents a different mouse strain. Expression data was obtained from the GNF1M Gene Atlas Data set via the BioGPS website (<http://biogps.gnf.org>) [Su, A. I. et al. Proc Natl Acad Sci U S A 99, 4465-70 (2002); Wu, C. et al. Genome Biol 10, R130 (2009)]. n=30 mouse strains. Statistics: two-tailed Pearson Correlation.

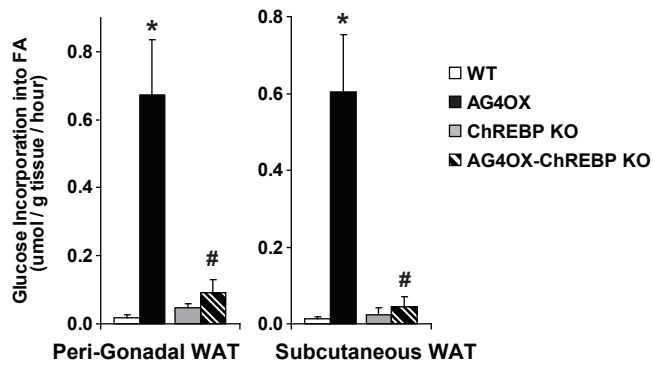

**Supplementary Figure 4.** Glucose incorporation into newly synthesized fatty acids is normalized in AG4OX adipose tissue lacking ChREBP. Values are means  $\pm$  SE.  $n = 5 - 6$  per group. \* $P < 0.05$  versus WT. # $P < 0.05$  versus AG4OX.

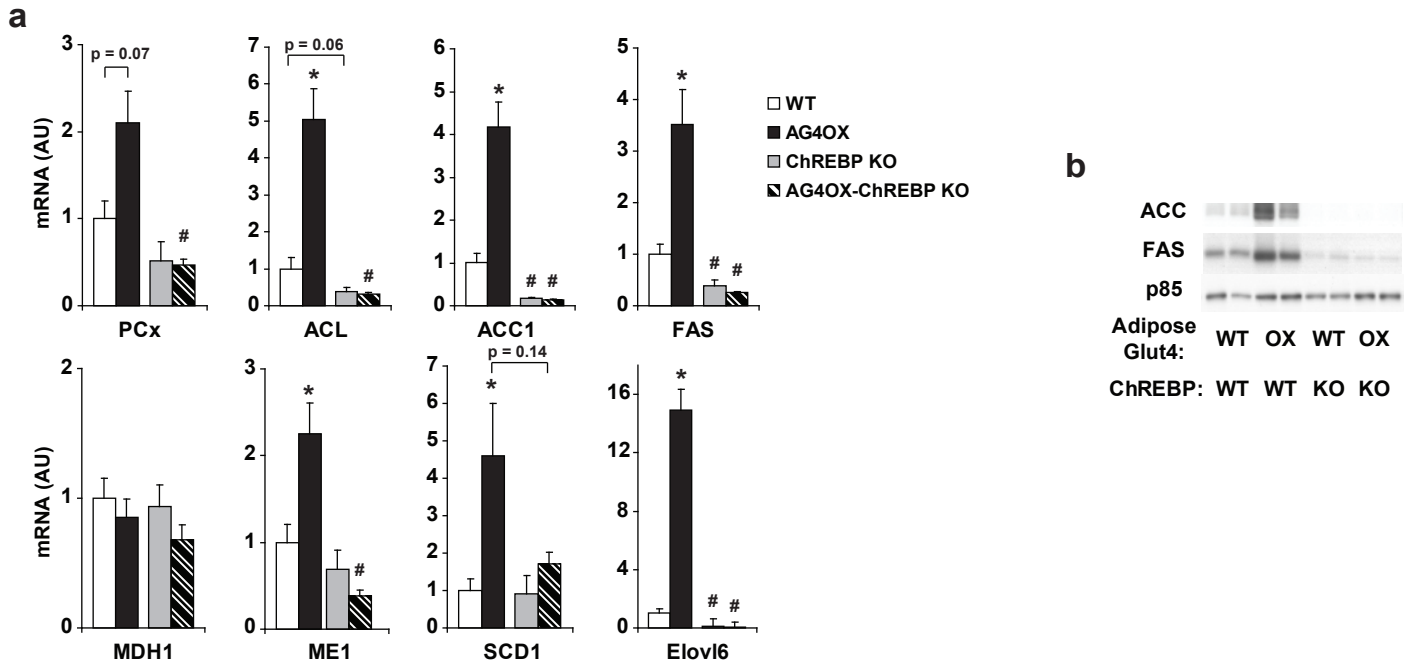

**Supplementary Figure 5.** a, mRNA expression of fatty acid synthetic enzymes and b, western blots of FAS, ACC, and p85 (loading control) proteins in SC fat from fed, 6-month-old females ( $n = 9 - 10$  per group), \* $P < 0.05$  versus WT. # $P < 0.05$  versus same AG4OX genotype, different ChREBP genotype.

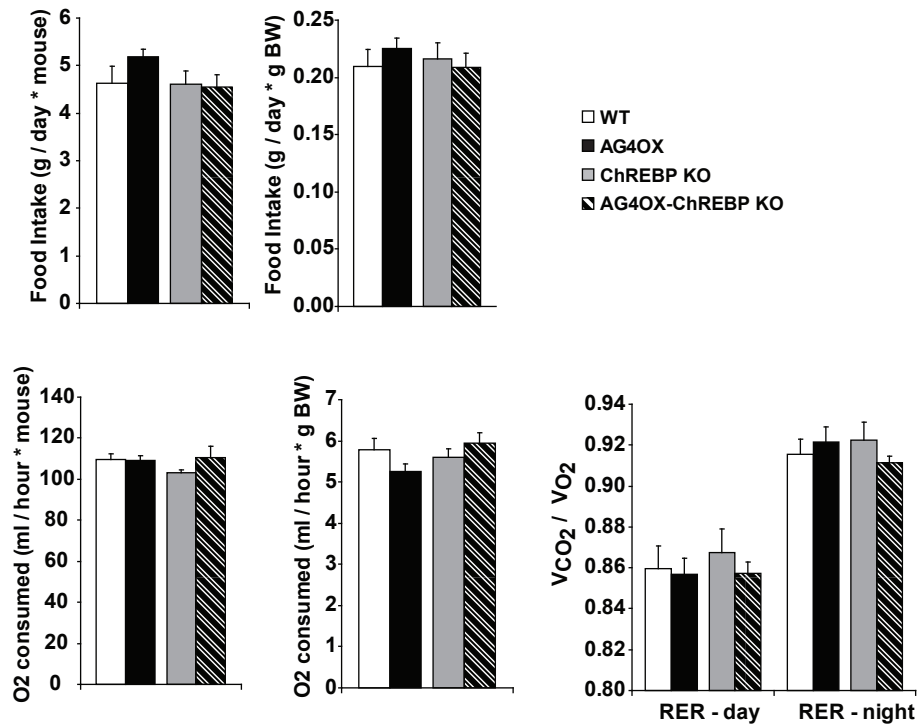

*Supplementary Figure 6.* Food Intake, energy expenditure, and respiratory exchange ratio (RER) measured in AG4OX mice crossbred with ChREBP KO mice. Food intake was measured in individually caged two-month-old female mice over two weeks. Metabolic measurements were made using the Comprehensive Lab Animal Monitoring System (Columbus Instruments). Food intake and O<sub>2</sub> consumption are expressed per mouse (left panels) and per gram body weight (right panels). Values are means  $\pm$  SE.  $n=7-8$  per group. Statistical comparisons were performed by ANOVA with pairwise comparisons by Tukey's test. No statistically significant changes were observed.

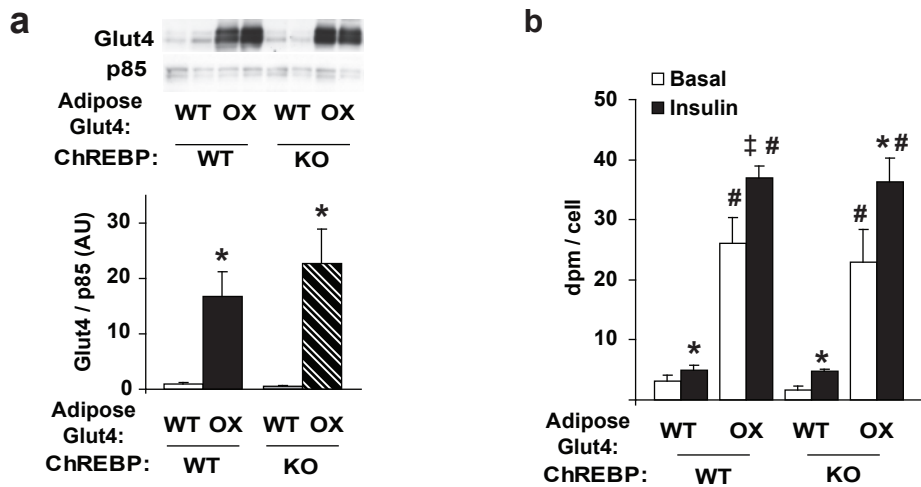

*Supplementary Figure 7.* a, Glut4 protein levels in perigonadal-fat of 6-month-old females (n=6-8 per group). \*P<0.001 within same ChREBP genotype. b, Basal and insulin-stimulated glucose uptake into adipocytes isolated from perigonadal fat (n=6 per group) from male mice. \*P<0.05 and ‡P=0.09 by paired t-test for the effect of insulin within genotype. #P<0.05 versus WT and ChREBP KO within same insulin treatment condition. OX, overexpressor.

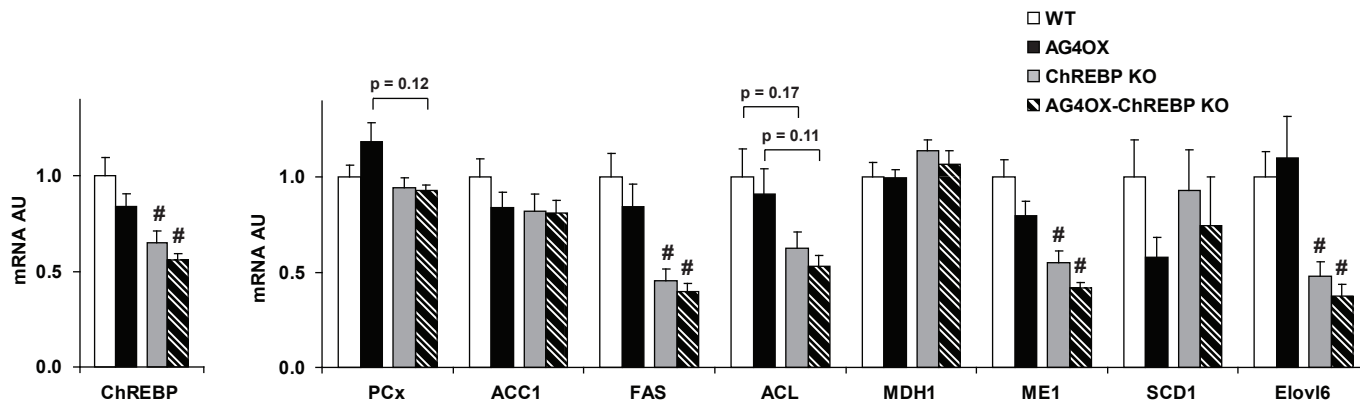

*Supplementary Figure 8.* Expression of ChREBP and lipogenic enzymes in liver of fed 6-month-old female mice. Values are means  $\pm$  SE. n=9-10 per group. #P<0.05 comparing same AG4OX genotype, different ChREBP genotype. Using qPCR primers which are proximal to the deleted exons in ChREBP KO mice, ChREBP mRNA can be detected in ChREBP KO tissues.

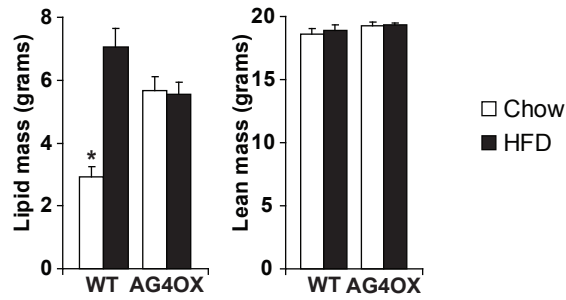

Supplementary Figure 9. Body composition in chow- and HFD-fed WT and AG4OX mice (9-week-old, n=8 per group), \* P<0.01 for WT-Chow compared to all others.

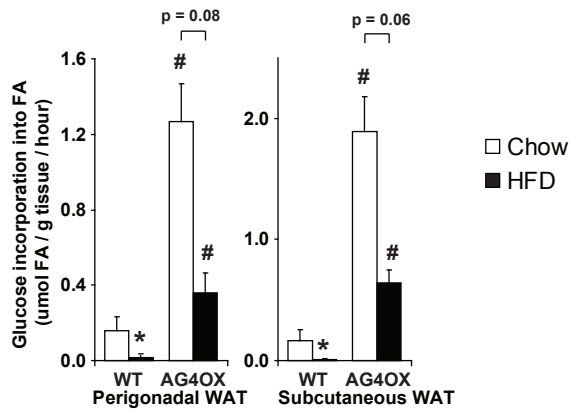

Supplementary Figure 10. Glucose incorporation into newly synthesized fatty acids is reduced in adipose tissue of WT and AG4OX mice on HFD. Values are means  $\pm$  SE. n=7 per group. \* P<0.05 compared to WT chow. #P<0.05 compared within diet, WT to AG4OX.

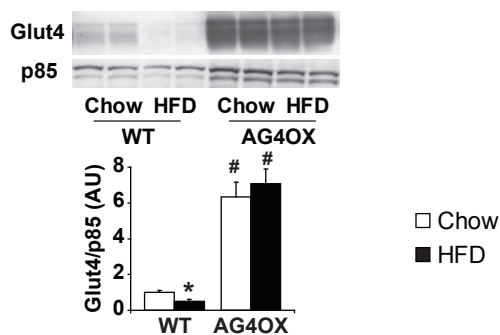

Supplementary Figure 11. Glut4 protein levels in PG fat from 4-month-old-males (n=6-8 per group), \* P<0.05 compared to WT chow. #P<0.05 compared within diet, WT to AG4OX. p85 is a loading control.

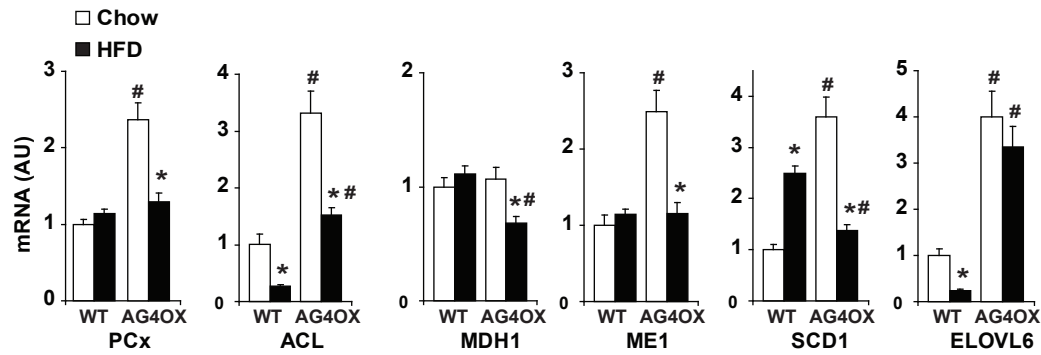

*Supplementary Figure 12.* mRNA expression of fatty acid synthetic enzymes in SC fat from 4-month-old male mice (n=8-14 per group). \*P<0.05 compared to same genotype, different diet. #P<0.05 compared to same diet, different genotype.

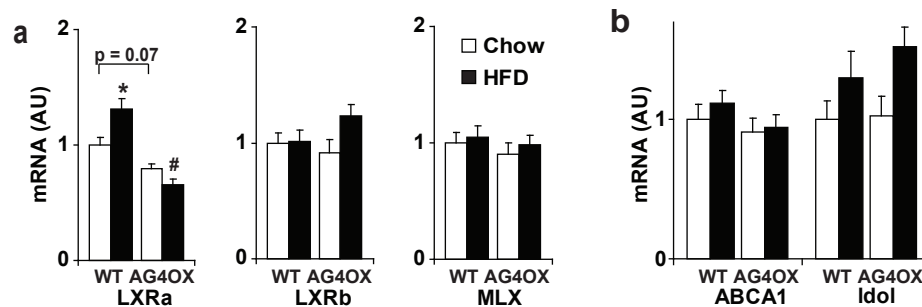

*Supplementary Figure 13.* a, mRNA expression of LXRs and MLx, and b, LXR transcriptional targets in SC fat from 4-month-old male mice (n=8-14 per group). \* P<0.05 compared to WT chow. #P<0.05 compared to WT HFD diet.

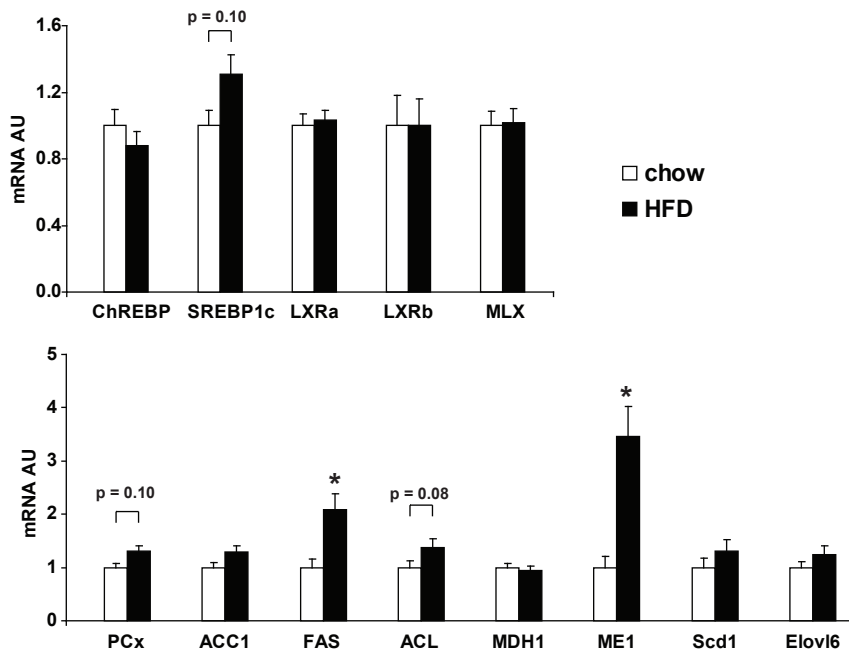

*Supplementary Figure 14.* Liver mRNA expression in 4-month-old male WT mice on chow versus HFD. Values are means  $\pm$  SE. n = 10-14 per group. \* P < 0.05 comparing chow to HFD.



| Nucleotide      | Position |    |    |    |   |    |   |   |    |    |    |    |    |    |    |    |    |
|-----------------|----------|----|----|----|---|----|---|---|----|----|----|----|----|----|----|----|----|
|                 | 1        | 2  | 3  | 4  | 5 | 6  | 7 | 8 | 9  | 10 | 11 | 12 | 13 | 14 | 15 | 16 | 17 |
| A               | 1        | 13 | 0  | 0  | 3 | 0  | 3 | 3 | 5  | 8  | 5  | 0  | 6  | 1  | 5  | 3  | 0  |
| C               | 13       | 0  | 12 | 0  | 3 | 0  | 5 | 5 | 10 | 3  | 2  | 12 | 4  | 13 | 0  | 0  | 0  |
| G               | 2        | 3  | 0  | 16 | 1 | 16 | 8 | 3 | 1  | 1  | 7  | 4  | 3  | 0  | 11 | 0  | 16 |
| T               | 0        | 0  | 4  | 0  | 9 | 0  | 0 | 5 | 0  | 4  | 2  | 0  | 3  | 2  | 0  | 13 | 0  |
| Consensus ChoRE | C        | A  | C  | G  | T | G  |   |   |    |    |    | C  | A  | C  | G  | T  | G  |

*Supplementary Figure 15.* Position weight matrix for ChoREs. This matrix is generated by counting the frequency of each nucleotide species at each position in the aligned ChoREs of 16 reported and experimentally validated ChoREs in human, mouse, or rat ChREBP targets. [Minn, A. H., et al. *Endocrinology* 146, 2397-405 (2005); O'Callaghan, B. L., et al. *J Biol Chem* 276, 16033-9 (2001); Pedersen, K. B., et al. *Biochem J* 426, 159-70 (2009); Shih, H. M., et al. *J Biol Chem* 267, 13222-8 (1992)]

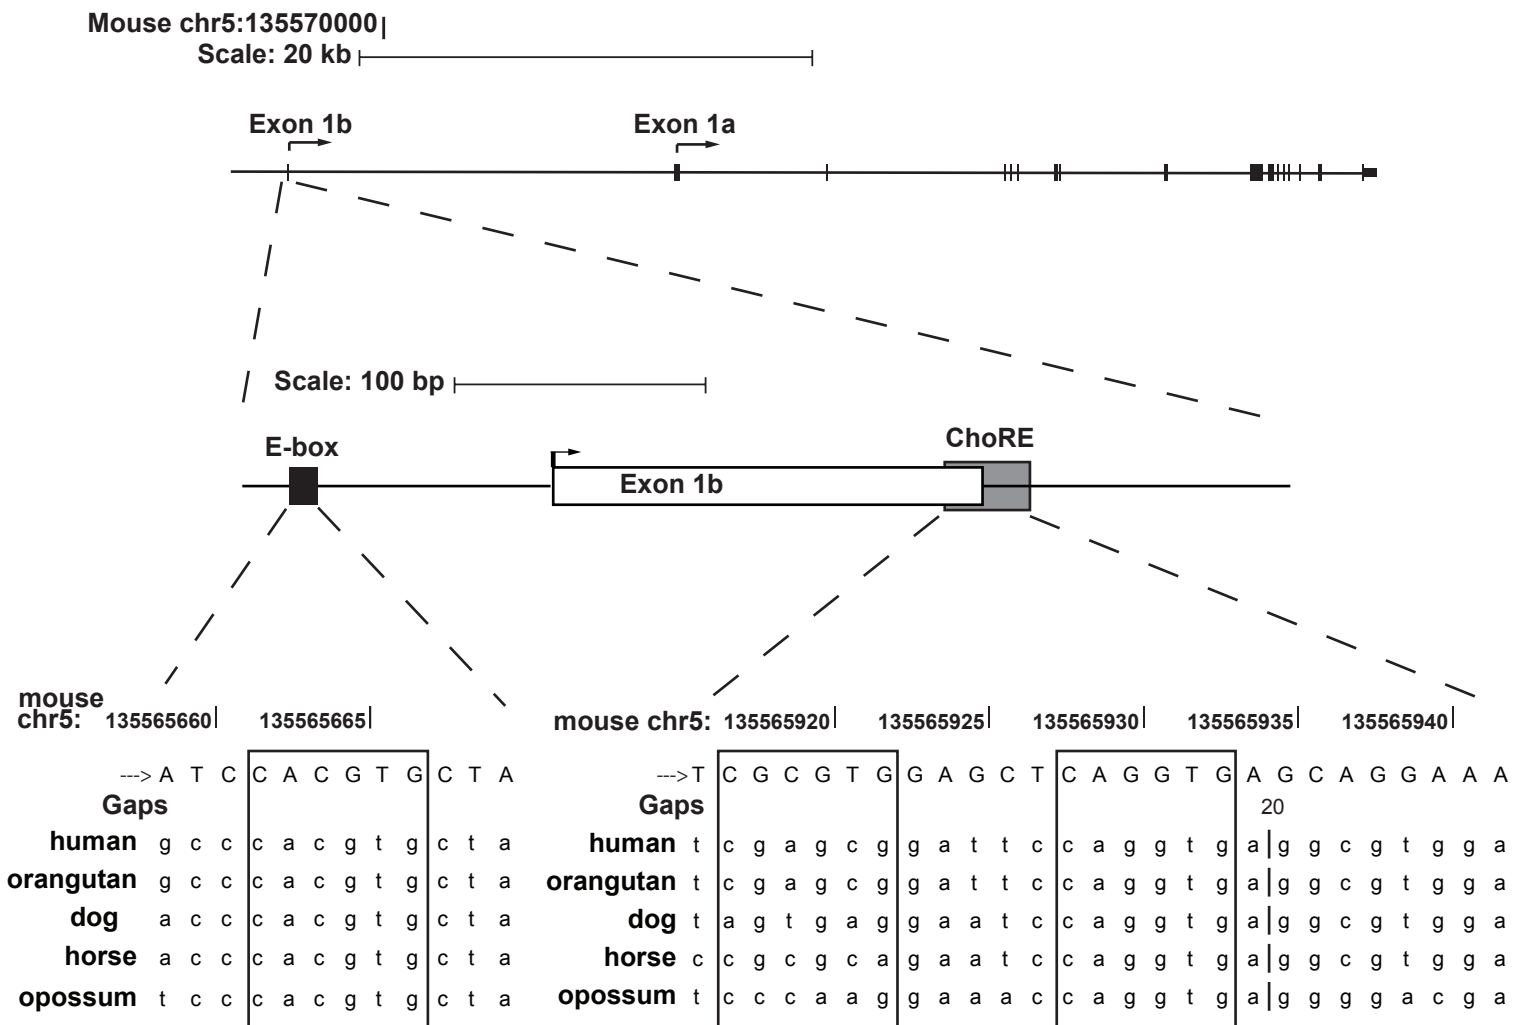

*Supplementary Figure 16.* Conservation of E-box and ChoRE in ChREBP Gene. Sequence is obtained from, and elements of the image are adapted, from <http://genome.ucsc.edu><sup>43,44</sup>.

|           |                                                                                          |     |
|-----------|------------------------------------------------------------------------------------------|-----|
| Consensus | CTGAGCGGCTGCCACCCACGTGCTAAGGAGAGAAGGAGGCACCGGATCAAGGGGCAAAGGACACCTC- - - - - GGAGCGG     |     |
|           | 10 20 30 40 50 60 70 80                                                                  |     |
| mouse     | AGGAGCGGCTGCCATCCACCGTGCTAAGGAGAGAAGGAGGCACCGACCAAGGGGCAAAGGACACCTC- - - - - GGAGCGG     | 74  |
| human     | CTGAGCGGCTGCCGCCACCGTGCTAAGGAGAGAAGGAGGCACCGATCAAGGGGCAAAGGACACCTC- - - - - GGAGCGG      | 74  |
| orangutan | CTGAGCGGCTGCCGCCACCGTGCTAAGGAGGGAAGGAGGCACCGGATCAAGGGGCAAAGGACATCTC- - - - - GGAGCGG     | 74  |
| dog       | GTGAGCGGCTGCCACCCACCGTGCTAAGGAGAGAAGGAGGCACCGGATCAAGGGGCAAAGGACATCTG- - - - - GAGCAGCG   | 76  |
| horse     | GTGAGCGGCTGCCACCCACCGTGCTAAGGAGAGAAGGAGGCACCGGATCAAGGGGCAAAGGACACCCCTAGCGAGCGGCG         | 80  |
| opossum   | CTGATCGGCTGCCTCCACCGTGCTAAGGAGAGAAGGAGGCACCGAGAGAGGGTCAAAGGACACCTT- - - - - GAAGAGA      | 74  |
|           |                                                                                          |     |
| Consensus | GXGXGCGGG- GGTGCCCGC- - - - - GTCCACACCCGCTGCTAAAAGCCGGG- CCCGXG- - - GCGCAGCGCACGGA     |     |
|           | 90 100 110 120 130 140 150 160                                                           |     |
| mouse     | GAGGGCGGG- GGAACCTGCAGCGCCAGCAGTCCACACCCAGTCTAAAAGCCGGGCTTCGTGCGGGCGCAGCGCACGGA          | 153 |
| human     | G- - - GCGGG- GGTGCCCGC- - - - - GTCCACACCCGCTGCTAAAAGCCGGG- CCCGCG- - - GCGCAGCGCACGGA  | 135 |
| orangutan | G- - - GCGGG- GGTGCCCGC- - - - - GTCCACACCCGCTGCTAAAAGCCGGG- TCCGCG- - - GCGCAGCGCACGGA  | 135 |
| dog       | GGGGCCGGGCAAGTGCCCA- - - - - GTCCACACCCGCCACTAAAAGCCGGG- CCCAGG- - - GTGCAGTGCATAGA      | 140 |
| horse     | GCGGGCGGGCGGGGCGGGTAGTGCCCGCTCCACACCCGCTGCTAAAAGCTGTCCGCGGGCGCAGCGCAGCAGCACGGA           | 160 |
| opossum   | CCA- GTGATAGGACGCTGGGGACAGATC- ATAGGGAACGACTATAAGGCTCTGAGTCTCAAGC- AGAACAGCCACAGA        | 151 |
|           |                                                                                          |     |
| Consensus | GCCCTCTGCCGCCCGCGCXGAGAAGXCGCGGGGCGCGGCCGCCXXGGCCC- - - GAGCATCCCXGCAGCXXCCCGCGGCC       |     |
|           | 170 180 190 200 210 220 230 240                                                          |     |
| mouse     | GCCCTCTGCCCGCTGCGCGGGGAAGGCGCGGGGTGAGGCCGACGCGGCCT- - - GAGCATCT- - - GCAGCCTCGCGGAGACCC | 229 |
| human     | GCCCTCTGCCGCCCGCGCGGAGAAGGCGCGGGCGCGGTCCGCGGTCCC- - - AAGCATCCCCGCAGCGCCCGCGGCC          | 213 |
| orangutan | GCCCTCTGCCGCCCGTGCAGAGAAGGCGCGGAGCGCGGTGGGCGGTCCC- - - AAGCATCCCCGCACCGCCCGCGGCC         | 213 |
| dog       | GCCCTCTGCCGCCAGCGCAGAGAAGACGCGGCCGCTGTCCGCTCGGCCCGGAGCATCCT- GCATGTGCCCGTGGCCC           | 219 |
| horse     | GCGCTCTGCCGCCGCTGCAAAAAGACGTGGG- - - - - AGCCTCCGCGGCC- - - GAGCATCCC- GCGAGCACCTCGCGGCC | 232 |
| opossum   | GCCCTCTGGTGGCGAGCAGAGCAGAGTGTGACCCGGGACGCTGGGAGG- GAGGAGGACAGAGCATCCCCAAGCCAC            | 230 |
|           |                                                                                          |     |
| Consensus | GCCXCCGXCG- XX- X- XXX- - - - - GXCTGGCCGCGXCCCGCCCACTGCAGATCGCGCGGAATCCAGGTG            |     |
|           | 250 260 270 280 290 300 310 320                                                          |     |
| mouse     | GAGGTCACAGG- - - - - ATCCGAGCCAGCCGACGCCATCTGCAGATCGCGTGGAGCTCAGGTG                      | 288 |
| human     | GCCGCCGCGC- - - - - CCTGGCCGCGCCGCGCC- - - TCTGCAGGTGAGCGGATTCAGGTG                      | 268 |
| orangutan | GCCGCCGCGCCCGCGCGGA- - - - - CCCCAGCCCTGGCCGCGCCGCGCC- - - TCTGCAGGTGAGCGGATTCAGGTG      | 286 |
| dog       | GGACCCAGACACCGCTGGAGGGACTCTGGGCGCTGCCTGGGACCTGCTACACCAAGCAGATAGTGAAGAAATCCAGGTG          | 299 |
| horse     | GGCCCGGACG- - - - - CCGTCTGGGACCCGCCACCCGCGGACGCGCAGAATCCAGGTG                           | 288 |
| opossum   | CCGCTGGGCTGCCCAAGAGGGGGACGT- - - - - GAAGGAGCAGCCACTCACGCCACCCACCGCTCCCAAGGAAACCAAGGTG   | 307 |
|           |                                                                                          |     |
| Consensus | AGGGGGXTGGXGXCXCGXGXCATCAGGTGGGTG- CAGGTGCCTCXCCXAG- - - GGGAXTXGGAXCCC                  |     |
|           | 330 340 350 360 370 380                                                                  |     |
| mouse     | AGCAGGAAAGATCTTCA- GTTATCAGAGGGACA- TAGATGCCTCGCAGAGG- - - AGGACTCAGAGCCC                | 351 |
| human     | AGGGCGTGGAGCCCGCGTCACTCAGGTGGGTG- CAGGGCCCTCACCCAAG- - - GGGAATTGGATCCG                  | 332 |
| orangutan | AGGGCGTGGAGCCCGCGTCACTCAGGTGGGTG- CAGGGCCCTCACTCAAG- - - GGGAATTGGATCCG                  | 350 |
| dog       | AGGGCGTGGAG- - - - - GGCATCAGGTGGTG- CAGGTGCCTAGCCAGG- - - GGGAGCTGATCCTC                | 357 |
| horse     | AGGGCGTGGAGGGCATCGGCCCAAGGAGTGGTGTCTCCTCTCCGATCCTGGACCTGACCTCC                           | 356 |
| opossum   | AGGGATCTTCCGGTTAG- GGAAGGGACGAGGA- CGGGTGACAGCCAAGGAAGGAGGAGGC                           | 366 |

**Supplementary Figure 17.** Alignment of genomic sequence obtained from <http://genome.ucsc.edu><sup>43,44</sup>. Alignment performed by Clustal W algorithm using Megalign (Dnastar) software. Sequence highlighted in blue corresponds to mouse exon 1b. Sequence highlighted in red corresponds to the upstream E-box. Sequence highlighted in yellow corresponds to the ChoRE. Sequence assemblies and coordinates are as follows:

- Mouse: July 2007 (NCBI37/mm9) Assembly; Chr5(+):135565646-135565996.
- Human: Feb. 2009 (GRCh37/hg19) Assembly; Chr7(-):73062038 -73062369.
- Orangutan: July 2007 (WUGSC 2.0.2/ponAbe2) Assembly; Chr7(+):14424980 -14425329.
- Dog: May 2005 (Broad/canFam2) Assembly; Chr6(+):9619418-9619774.
- Horse: Sep. 2007 (Broad/equCab2) Assembly; Chr13(-):11282385 -11282740.
- Opossum: Oct. 2006 (Broad/monDom5) Assembly; Chr2(-):530122703-530123068.

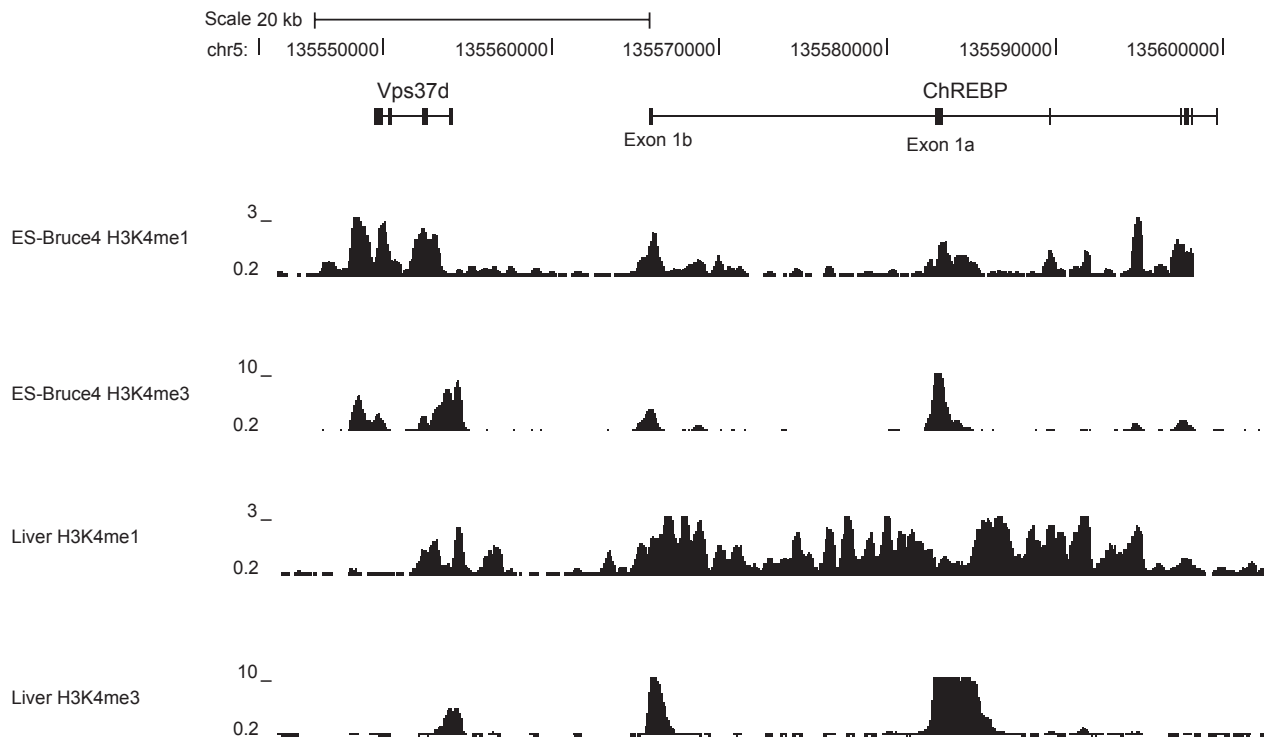

*Supplementary Figure 18.* Mono-methylation of lysine 4 of histone H3 (H3k4me1) and tri-methylation of lysine 4 of histone H3 (H3k4me3) is suggestive of the presence of an active promoter<sup>45,46</sup>. The peaks in the above graph indicate genomic regions with increased H3K4me1 or H3k4me3. Peaks align under ChREBP exon 1a which is the canonical transcriptional start site for ChREBP. H3k4me1 and H3k4me3 marks are also increased in the genomic region 17 kb 5' of the canonical ChREBP exon 1a in the Bruce4 embryonic stem cell line and in liver tissue suggesting the presence of an active promoter in this genomic region. ChREBP exon 1b aligns with this region. Image adapted from <http://genome.ucsc.edu><sup>43</sup>.

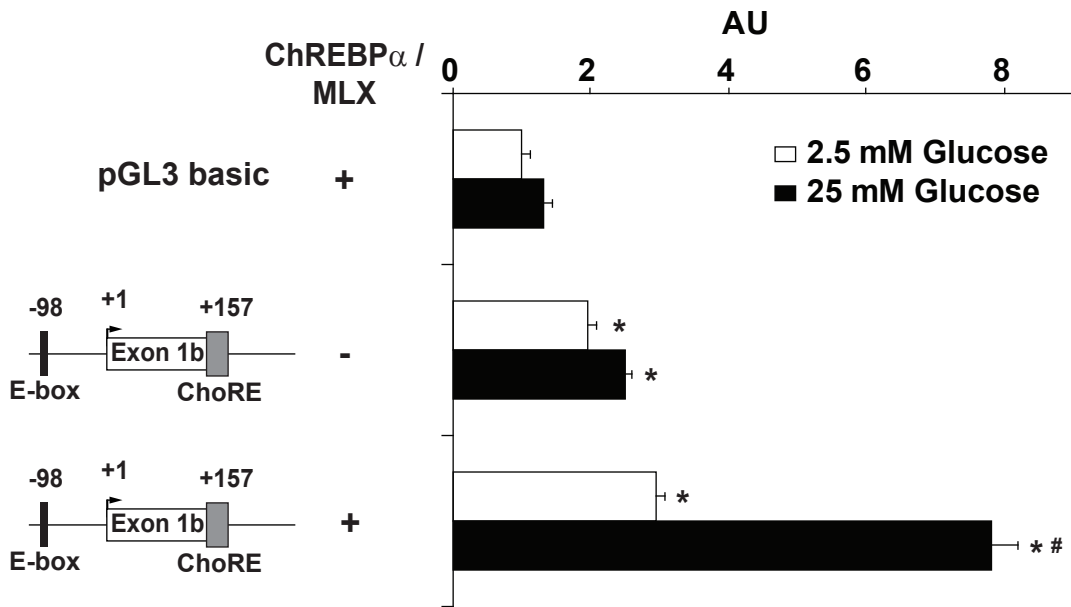

*Supplementary Figure 19.* Glucose-dependent expression of the exon 1b-promoter-luciferase construct requires co-transfection of ChREBP $\alpha$  and Mlx in HEK293T cells. (n=3/group). \*P<0.05 compared to pGL3 basic in the same glucose condition. #P<0.05 compared to exon1b-luciferase construct in low glucose. This is representative of three independent experiments.

## ChREBP $\alpha$

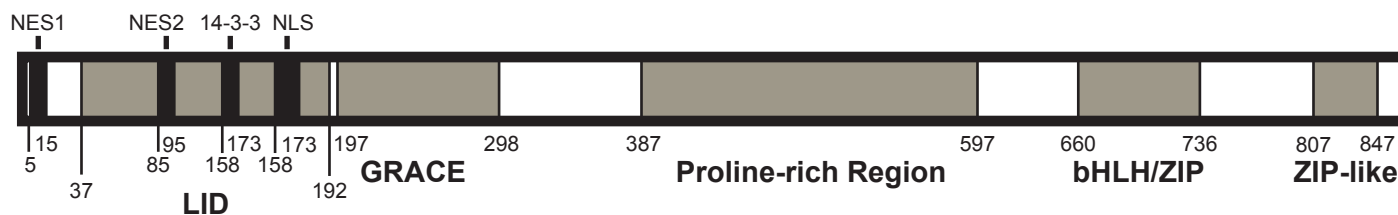

## ChREBP $\beta$

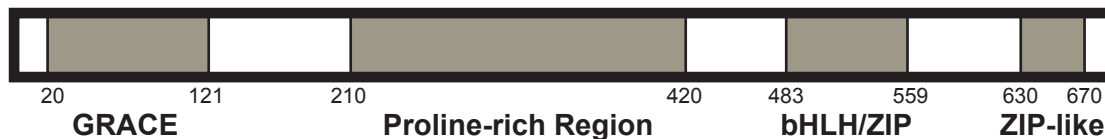

*Supplementary Figure 20.* Mouse ChREBP $\alpha$  (864 amino acids) and ChREBP $\beta$  (687 amino acids) protein structure. NES1 and NES2: nuclear export signals 1 and 2. 14-3-3: binding site for 14-3-3 protein. NLS: nuclear localization sequence. LID: low glucose inhibitory domain. GRACE: glucose response conserved element. Proline-rich region. bHLH/ZIP: basic helix-loop-helix-leucine zipper. ZIP-like: leucine zipper-like domain [the location of domains within the ChREBP protein adapted from and reviewed in Poupeau, A. and Postic, C. *Biochimica et Biophysica Acta* 1182, 995-1006 (2011)].

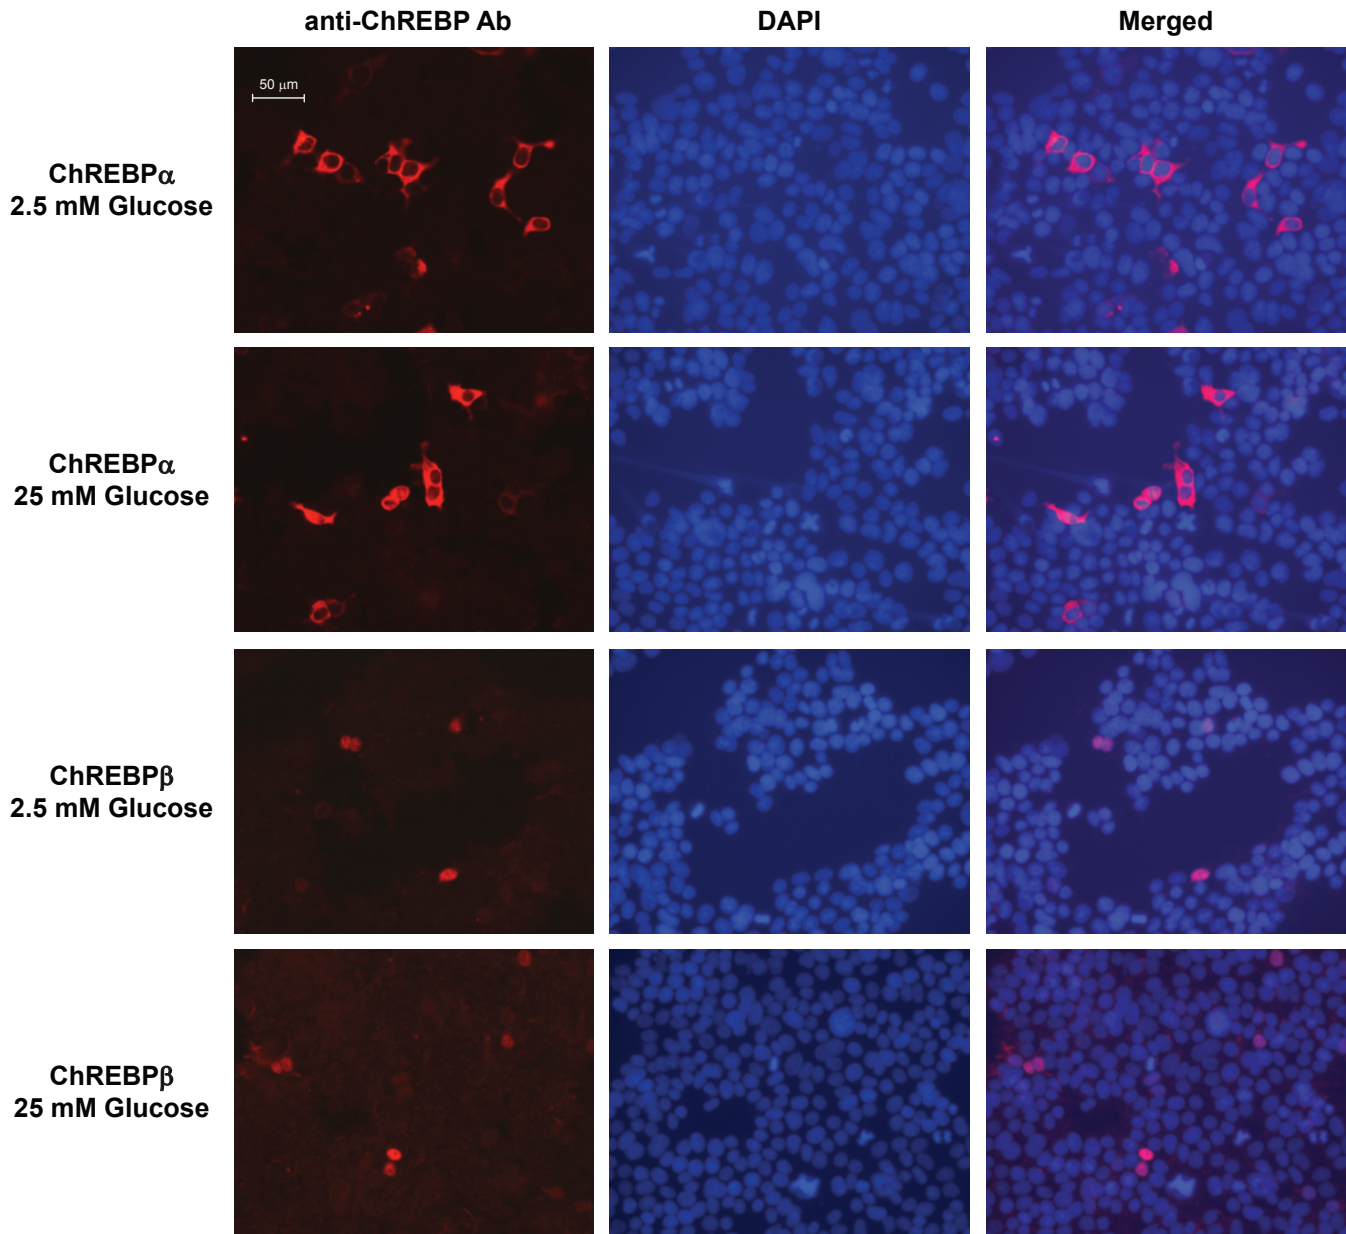

*Supplementary Figure 21.* ChREBP $\alpha$  is localized in the nucleus in low and high glucose conditions. In contrast, ChREBP $\beta$  is predominantly localized in the cytoplasm in low and high glucose conditions. The panels labeled anti-ChREBP Ab show ChREBP $\alpha$  or ChREBP $\beta$  localization in red. The panels labeled Dapi show nuclei in blue. The panels labeled Merged show the merged images of ChREBP and nuclear staining. HEK392T cells were transfected with Flag-tagged ChREBP $\alpha$  or ChREBP $\beta$  and co-transfected with Mix overnight in DMEM + 10% FBS. Cells were subsequently incubated in DMEM with 2.5 mM glucose and 10% FBS. Cells were either maintained in 2.5 mM glucose or, after 4 hours, changed to 25 mM glucose. Cells were fixed in methanol after 2 hours (shown above) or 18 hours incubation (data not shown). ChREBP localization at both glucose concentrations was similar after 2 or 18 hours incubation. Immunofluorescence was performed using a rabbit polyclonal anti-ChREBP antibody (Novus Biologicals) and an Alexa-Fluor 594-conjugated goat anti-rabbit antibody (Invitrogen). Nuclei were stained with Dapi (Vector Systems). Similar findings were also obtained by Western blotting nuclear and extra-nuclear lysates after subcellular fraction of HEK293T cells transfected with ChREBP $\alpha$  or ChREBP $\beta$  (data not shown). Transfection with the same molar concentrations of ChREBP $\alpha$  and  $\beta$  plasmids results in markedly lower levels of ChREBP $\beta$  protein (data not shown).

**a**

| <b>NAME</b>                     | <b>SIZE</b> | <b>NES</b> | <b>NOM p-val</b> | <b>FDR q-val</b> |
|---------------------------------|-------------|------------|------------------|------------------|
| FATTY_ACID_SYNTHESIS            | 8           | -1.92      | 0.00             | 0.15             |
| MALATEXPATHWAY                  | 6           | -1.80      | 0.00             | 0.25             |
| MATRIX_METALLOPROTEINASES       | 19          | -1.76      | 0.08             | 0.24             |
| CYTOKINEPATHWAY                 | 22          | -1.70      | 0.03             | 0.25             |
| ST_INTERLEUKIN_13_PATHWAY       | 8           | -1.67      | 0.08             | 0.25             |
| ST_IL_13_PATHWAY                | 8           | -1.56      | 0.07             | 0.43             |
| ROS                             | 9           | -1.52      | 0.08             | 0.47             |
| MAP00480_GLUTATHIONE_METABOLISM | 26          | -1.48      | 0.10             | 0.53             |
| KREBS-TCA_CYCLE                 | 26          | -1.46      | 0.00             | 0.51             |
| GPCRS_CLASS_B_SECRETIN-LIKE     | 16          | -1.43      | 0.10             | 0.55             |

**b**

| <b>PROBE</b> | <b>GENE SYMBOL</b> | <b>GENE NAME</b>                     | <b>RANK IN GENE LIST</b> |
|--------------|--------------------|--------------------------------------|--------------------------|
| 93308_s_at   | PCX                | pyruvate carboxylase                 | 12245                    |
| 98575_at     | FASN               | fatty acid synthase                  | 12140                    |
| 162288_f_at  | PCX                | pyruvate carboxylase                 | 12044                    |
| 160207_at    | ACLY               | ATP citrate lyase                    | 12038                    |
| 100593_at    | TNNT2              | troponin T2, cardiac                 | 11794                    |
| 162077_f_at  | SCD5               | stearoyl-CoA desaturase 5            | 4857                     |
| 95758_at     | SCD5               | stearoyl-CoA desaturase 5            | 4219                     |
| 95485_at     | HADH               | hydroxyacyl-Coenzyme A dehydrogenase | 3839                     |

*SupplementaryTable 1.* Gene Set Enrichment Analysis (GSEA) in adipose tissue of AG4OX mice.

Total RNA from epididymal adipose tissue was extracted using the RNeasy Mini Kit from Qiagen from three mice from each of two genotypes: AG4OX and FVB littermate controls. RNA from each mouse was hybridized on an Affymetrix MG-U74-A.v2 Genechip microarray containing (12,421 probes). Genome-wide expression analysis of the microarray data was performed using gene set enrichment analysis (GSEA) software version 2.05 available from the Broad Institute (<http://www.broadinstitute.org/gsea/downloads.jsp>)<sup>11</sup> and gene set database version s2.mgu74av2.gmt containing 522 distinct gene sets.

In Supplemental Table 1a, the top ten up-regulated gene sets ranked by “NES” - normalized enrichment score - in AG4OX adipose tissue compared to controls are listed. “Name” indicates the name of the gene set as listed in the s2.mgu74av2.gmt database. “Size” refers to the number of genes in the gene set. “Nom p-val” and “FDR q-val” indicate the nominal p-values and false discovery rates for the individual sets, respectively, as calculated by the GSEA analysis software.

In Supplemental Table 1B, the Affymetrix Probe number, Gene Symbol, and Gene Name are listed for each gene included in the fatty acid synthesis gene set according to the s2.mgu74av2.gmt database. ‘Rank in Gene List’ refers to the position of the gene in the ranked list of all genes present in our expression dataset and ranked by signal to noise ratio. The GSEA algorithm calculates an enrichment score reflecting the degree to which the genes included in a gene set are overrepresented at the top or bottom of the ranked list of all genes present in the expression dataset.

|                              | WT          | AG4OX          | ChREBP KO   | AG4OX-<br>ChREBP KO |
|------------------------------|-------------|----------------|-------------|---------------------|
| Glucose (mg/dl)              | 193 ± 9     | 148 ± 6 *      | 211 ± 9     | 205 ± 7 #           |
| Insulin (ng/ml)              | 1.02 ± .13  | 0.82 ± 0.10    | 1.46 ± 0.21 | 1.26 ± 0.19 †       |
| Glucose * Insulin<br>Product | 196 ± 24    | 124 ± 17 ‡     | 314 ± 51 §  | 261 ± 42 #          |
| Leptin (ng/ml)               | 4.37 ± 1.17 | 2.82 ± 0.78    | 4.30 ± 1.14 | 2.35 ± 0.36         |
| NEFA (mM)                    | 0.66 ± 0.05 | 0.77 ± 0.05    | 0.56 ± 0.04 | 0.59 ± 0.03 #       |
| Triglyceride<br>(mg/dl)      | 62.9 ± 8.06 | 91.4 ± 10.73 £ | 50.2 ± 6.42 | 52.9 ± 5.47 #       |

*Supplementary Table 2.* Serum metabolites in AG4OX mice crossbred with ChREBP KO mice on chow diet. Serum was collected from 6-month-old female mice in the fed state at 9 AM. Values are means ± SE. n = 9-10 per group. Statistical comparisons were performed by ANOVA with pairwise comparisons by Tukey's test. \* P<0.05 comparison between different AG4OX genotypes with same ChREBP genotype; # p < 0.05 comparison between different ChREBP genotypes with same AG4OX genotype. † P=0.15 compared to AG4OX; ‡ P=0.12 compared to WT; § P=0.20 compared to WT; £ P=0.07 compared to WT.



|                                  | <b>WT-Chow</b>     | <b>WT-HFD</b>         | <b>AG4OX-Chow</b>    | <b>AG4OX-HFD</b>      |
|----------------------------------|--------------------|-----------------------|----------------------|-----------------------|
| <b>Glucose (mg/dl)</b>           | <b>225 ± 7</b>     | <b>253 ± 7 *</b>      | <b>159 ± 6 #</b>     | <b>215 ± 11 *#</b>    |
| <b>Insulin (ng/ml)</b>           | <b>1.65 ± 0.12</b> | <b>2.96 ± 0.28 *</b>  | <b>1.14 ± 0.17 †</b> | <b>3.27 ± 0.56 *</b>  |
| <b>Glucose * Insulin Product</b> | <b>376 ± 28</b>    | <b>682 ± 75 *</b>     | <b>248 ± 51 #</b>    | <b>755 ± 169 *</b>    |
| <b>Leptin (ng/ml)</b>            | <b>4.86 ± 1.17</b> | <b>13.01 ± 0.78 *</b> | <b>3.41 ± 1.14</b>   | <b>5.73 ± 0.36 *#</b> |
| <b>NEFA (mM)</b>                 | <b>0.77 ± 0.03</b> | <b>0.77 ± 0.04</b>    | <b>1.14 ± 0.05 #</b> | <b>0.98 ± 0.06 *#</b> |
| <b>Triglyceride (mg/dl)</b>      | <b>196 ± 12</b>    | <b>137 ± 11 *</b>     | <b>242 ± 13 #</b>    | <b>190 ± 11 *#</b>    |

*Supplementary Table 3.* Fed serum metabolites in WT vs AG4OX mice on chow vs HFD. Serum was collected from 4-month-old male mice in the fed state from 9 AM to 11 AM. Values are means ± SE. n = 11-17 per group. Statistical comparisons were performed by ANOVA with pairwise comparisons by Tukey's test. \* P<0.05 comparison within genotype (chow compared to HFD); # P<0.05 comparison within diet (WT compared to AG4OX); † P=0.054 compared to WT-chow.

Anthropometric characteristics of cross-sectional study subjects (Fig. 3f-g)

|                          |             |
|--------------------------|-------------|
| Number (men/women)       | 123 (64/59) |
| Age (years)              | 57 ± 15     |
| BMI (kg/m <sup>2</sup> ) | 29.8 ± 6.5  |
| % Body Fat               | 31 ± 10     |

Anthropometric characteristics of obese case-control subjects (Fig. 3h-i and Fig. 5b)

|                          |            |
|--------------------------|------------|
| Number (men/women)       | 38 (28/10) |
| Age (years)              | 41 ± 11    |
| BMI (kg/m <sup>2</sup> ) | 36.6 ± 4.6 |
| % Body Fat               | 41 ± 9     |

*Supplementary Table 4.* Anthropometric characteristics of human study subjects. All values are Means ± SD

Model Summary<sup>b</sup>

| R                 | R Square | Adjusted R Square | Std. Error of the Estimate |
|-------------------|----------|-------------------|----------------------------|
| .554 <sup>a</sup> | .307     | .259              | 80.905                     |

a. Predictors: (Constant), Log AT ChREBP Beta (AU), Log AT ChREBP Alpha (AU)

b. Dependent Variable: Glucose Rd % stim

ANOVA<sup>b</sup>

| Model      | Sum of Squares | df | Mean Square | F     | Sig.              |
|------------|----------------|----|-------------|-------|-------------------|
| Regression | 84139.554      | 2  | 42069.777   | 6.427 | .005 <sup>a</sup> |
| Residual   | 189821.946     | 29 | 6545.584    |       |                   |
| Total      | 273961.500     | 31 |             |       |                   |

a. Predictors: (Constant), Log AT ChREBP Beta (AU), Log AT ChREBP Alpha (AU)

b. Dependent Variable: Glucose Rd % stim

Coefficients<sup>a</sup>

| Model                    | Unstandardized Coefficients |            | Standardized Coefficients | t     | Sig. | Correlations |         |      |
|--------------------------|-----------------------------|------------|---------------------------|-------|------|--------------|---------|------|
|                          | B                           | Std. Error | Beta                      |       |      | Zero-order   | Partial | Part |
| (Constant)               | 609.126                     | 116.106    |                           | 5.246 | .000 |              |         |      |
| Log AT ChREBP Alpha (AU) | 102.333                     | 109.030    | .166                      | .939  | .356 | .388         | .172    | .145 |
| Log AT ChREBP Beta (AU)  | 80.457                      | 31.422     | .454                      | 2.560 | .016 | .535         | .429    | .396 |

a. Dependent Variable: Glucose Rd % stim

*Supplementary Table 5.* Linear regression analysis for ChREBP $\alpha$  and ChREBP $\beta$  as predictors of insulin sensitivity as measured by insulin stimulated glucose uptake (% over basal) in 32 obese non-diabetic individuals.

## Murine

| Gene Name                                                                       | Gene Symbol | Abbreviation in Text and Figures | Forward Primer          | Reverse Primer            |
|---------------------------------------------------------------------------------|-------------|----------------------------------|-------------------------|---------------------------|
| 18s ribosomal RNA                                                               | 18s         | 18s                              | TTGACTCAACACGGGAAACC    | AGACAAATCGCTCCACCAAC      |
| acetyl-Coenzyme A carboxylase alpha                                             | Acaca       | ACC1                             | TGTACAAGCAGTGTGGGCTGGCT | CCACATGGCCTGGCTTGGAGGG    |
| ATP citrate lyase                                                               | Acly        | ACL                              | GCCAGCGGGAGCACATC       | CTTTGCAGGTGCCACTTCATC     |
| MLX interacting protein-like                                                    | Mlxipl      | Total ChREBP                     | CACTCAGGGAATACACGCCTAC  | ATCTTGGTCTTAGGGTCTTCAGG   |
|                                                                                 |             | ChREBP $\alpha$                  | CGACACTCACCCACCTCTTC    | TTGTTCAGCCGGATCTTGTC      |
|                                                                                 |             | ChREBP $\beta$                   | TCTGCAGATCGCGTGGAG      | CTTGTCCCGGCATAGCAAC       |
| ELOVL family member 6, elongation of long chain fatty acids fatty acid synthase | Elov16      | Elov16                           | TCAGCAAAGCACCCGAAC      | AGCGACCATGTCTTTGTAGGAG    |
|                                                                                 | Fasn        | FAS                              | GCTGCGGAAACTTCAGGAAAT   | AGAGACGTGTCCTCCTGGACTT    |
| nuclear receptor subfamily 1, group H, member 3                                 | Nr1h3       | LXR $\alpha$                     | AGGAGTGTCGACTTCGCAAA    | CTCTTCTTGCCGCTTCAGTTT     |
| nuclear receptor subfamily 1, group H, member 2                                 | Nr1h2       | LXR $\beta$                      | ATAGTGGGTCACGAAGCAGC    | AGGGCAACAGAGTCGGAGAC      |
| malate dehydrogenase 1, NAD (soluble)                                           | Mdh1        | MDH1                             | AAGGCATGGAGAGGAAGGAC    | AGTTCGTATTGGCTGGGTTTC     |
| malic enzyme 1, NADP(+)-dependent, cytosolic                                    | Me1         | ME1                              | ATCACTTTGGATGTGGGAACAG  | CAGGAAGGCGTCATACTCAGG     |
| MAX-like protein X                                                              | Mlx         | MLX                              | GGAGCTCTCAGCTTGTGTCTTCA | CACCGATCACAATCTCTCGTAGAGT |
| pyruvate carboxylase                                                            | Pcx         | PCx                              | GGAGCTTATCCCGAACATCC    | CGGAAGACGTCCATACCATTC     |
| stearoyl-Coenzyme A desaturase 1                                                | Scd1        | SCD1                             | CCCTGCGGATCTTCCTTATC    | TGTGTTTCTGAGAACTTGTGGTG   |
| sterol regulatory element binding transcription factor 1 (isoform c)            | Srebp1f1    | SREBP1c                          | GGAGCCATGGATTGCACATT    | GGCCCCGGAAGTCACTGT        |
| TATA box binding protein                                                        | Tbp         | Tbp                              | CCCTATCACTCCTGCCACAC    | ACGAAGTGCAATGGTCTTTAGG    |

## Human

| Gene Name                    | Gene Symbol | Abbreviation in Text and Figures | Forward Primer       | Reverse Primer        |
|------------------------------|-------------|----------------------------------|----------------------|-----------------------|
| MLX interacting protein-like | Mlxipl      | ChREBP $\alpha$                  | AGTGCTTGAGCCTGGCCTAC | TTGTTCAGGCCGGATCTTGTC |
|                              |             | ChREBP $\beta$                   | AGCGGATTCCAGGTGAGG   | TTGTTCAGGCCGGATCTTGTC |

Supplementary Table 6. Gene names, symbols, abbreviations and qPCR primer sequences.
